# Supplementary material for: DBU-promoted ring-opening reactions of multi-substituted donor–acceptor cyclopropanes: access to functionalized chalcones with a quaternary carbon group
Source: Royal Society of Chemistry journal article supplement (doi:10.1039/d0ob01895c), 2020-01-01
Supplement: d0ob01895c2.pdf [file d0ob01895c2.pdf]

**DBU-promoted Ring-opening Reactions of Multi-substituted Donor-Acceptor  
Cyclopropane: Access to Functionalized Chalcones With a Quaternary Carbon  
Group**

Naili Luo, Jiamin Liu, Shan Wang, Cunde Wang\*

*School of Chemistry and Chemical Engineering, Yangzhou University,  
180 Siwangting Street, Yangzhou 225002, P. R. China. Fax: +86-514-8797-5244; Tel:  
+86-514-8797-5568; E-mail: [wangcd@yzu.edu.cn](mailto:wangcd@yzu.edu.cn)*

1. X-ray data of compound **3b**.....S2
2. X-ray data of compound **3h**.....S9
3. X-ray data of compound **3m**.....S16
4. X-ray data of compound **3p**.....S23

Ethyl (Z)-4-(4-bromophenyl)-3-(4-chlorobenzoyl)-2-cyano-2-isopropylbut-3-enoate

**(3b)**

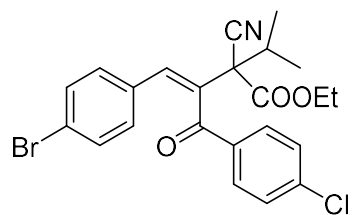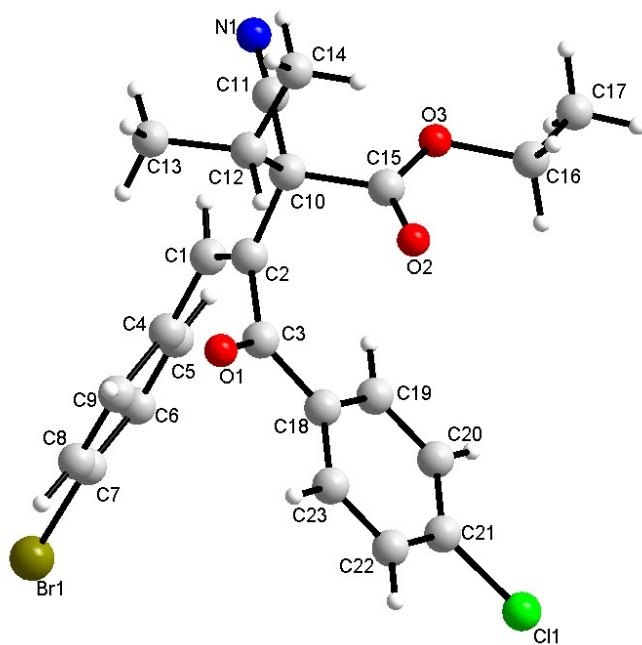

Table S1. Crystal data and structure refinement for **3b**.

|                                   |                                                                                                              |
|-----------------------------------|--------------------------------------------------------------------------------------------------------------|
| Identification code               | <b>3b</b>                                                                                                    |
| Empirical formula                 | C <sub>23</sub> H <sub>21</sub> BrClNO <sub>3</sub>                                                          |
| Formula weight                    | 474.76                                                                                                       |
| Temperature                       | 296 K                                                                                                        |
| Wavelength                        | 0.71073 Å                                                                                                    |
| Crystal system, space group       | Monoclinic, C2/c                                                                                             |
| Unit cell dimensions              | a = 24.318(3) Å    alpha = 90°.<br>b = 9.2383(11) Å    beta = 96.433(4)°.<br>c = 20.240(3) Å    gamma = 90°. |
| Volume                            | 4518.5(9) Å <sup>3</sup>                                                                                     |
| Z, Calculated density             | 8, 1.396 Mg/m <sup>3</sup>                                                                                   |
| Absorption coefficient            | 1.960 mm <sup>-1</sup>                                                                                       |
| F(000)                            | 1936                                                                                                         |
| Crystal size                      | 0.35 x 0.33 x 0.3 mm                                                                                         |
| Theta range for data collection   | 1.69 to 27.57°.                                                                                              |
| Limiting indices                  | -31<=h<=31, -12<=k<=11, -26<=l<=26                                                                           |
| Reflections collected / unique    | 32898 / 5163 [R(int) = 0.1008]                                                                               |
| Completeness to theta = 27.57     | 99.2 %                                                                                                       |
| Refinement method                 | Full-matrix least-squares on F <sup>2</sup>                                                                  |
| Data / restraints / parameters    | 5163 / 0 / 265                                                                                               |
| Goodness-of-fit on F <sup>2</sup> | 1.000                                                                                                        |
| Final R indices [I>2sigma(I)]     | R1 = 0.0593, wR2 = 0.1245                                                                                    |
| R indices (all data)              | R1 = 0.1794, wR2 = 0.1624                                                                                    |
| Largest diff. peak and hole       | 0.416 and -0.377 e.Å <sup>-3</sup>                                                                           |

Table S2. Atomic coordinates ( $\times 10^4$ ) and equivalent isotropic displacement parameters ( $\text{\AA}^2 \times 10^3$ ) for **3b**.

U(eq) is defined as one third of the trace of the orthogonalized Uij tensor.

|       | x        | y        | z       | U(eq)  |
|-------|----------|----------|---------|--------|
| Br(1) | 10891(1) | 2837(1)  | -6(1)   | 120(1) |
| Cl(1) | 9444(1)  | 6625(2)  | 3036(1) | 151(1) |
| O(3)  | 7119(1)  | 2673(3)  | 1250(1) | 85(1)  |
| C(18) | 8891(2)  | 2462(5)  | 2028(2) | 63(1)  |
| O(1)  | 8800(1)  | -66(4)   | 2034(1) | 85(1)  |
| C(3)  | 8685(1)  | 1055(5)  | 1743(2) | 63(1)  |
| C(15) | 7474(2)  | 1791(5)  | 1562(2) | 67(1)  |
| O(2)  | 7622(1)  | 1833(4)  | 2146(2) | 96(1)  |
| C(11) | 7401(2)  | 672(4)   | 442(2)  | 57(1)  |
| C(1)  | 8525(1)  | 1360(4)  | 524(2)  | 58(1)  |
| C(4)  | 9100(2)  | 1708(4)  | 430(2)  | 59(1)  |
| C(2)  | 8319(1)  | 1050(4)  | 1088(2) | 56(1)  |
| C(19) | 8735(2)  | 3778(6)  | 1743(2) | 79(1)  |
| C(10) | 7708(1)  | 659(4)   | 1115(2) | 55(1)  |
| C(9)  | 9549(2)  | 964(5)   | 751(2)  | 71(1)  |
| C(7)  | 10160(2) | 2388(5)  | 181(2)  | 75(1)  |
| C(12) | 7622(2)  | -859(5)  | 1423(2) | 71(1)  |
| C(6)  | 9725(2)  | 3130(5)  | -143(2) | 82(1)  |
| C(21) | 9245(2)  | 5010(6)  | 2637(2) | 90(1)  |
| N(1)  | 7169(1)  | 592(4)   | -73(2)  | 73(1)  |
| C(8)  | 10082(2) | 1301(6)  | 623(2)  | 79(1)  |
| C(5)  | 9200(2)  | 2773(5)  | -19(2)  | 74(1)  |
| C(23) | 9240(2)  | 2461(6)  | 2616(2) | 73(1)  |
| C(22) | 9415(2)  | 3731(7)  | 2916(2) | 88(1)  |
| C(14) | 7011(2)  | -1133(6) | 1492(2) | 95(2)  |
| C(20) | 8912(2)  | 5068(6)  | 2049(2) | 90(1)  |
| C(16) | 6917(2)  | 3844(7)  | 1670(3) | 125(2) |
| C(13) | 7869(2)  | -2049(5) | 1037(3) | 100(2) |
| C(17) | 6584(3)  | 4756(7)  | 1283(3) | 150(3) |

Table S3. Bond lengths [Å] and angles [°] for **3b**.

---

|                   |          |
|-------------------|----------|
| Br(1)-C(7)        | 1.903(4) |
| Cl(1)-C(21)       | 1.741(5) |
| O(3)-C(15)        | 1.298(5) |
| O(3)-C(16)        | 1.493(5) |
| C(18)-C(19)       | 1.381(6) |
| C(18)-C(23)       | 1.383(5) |
| C(18)-C(3)        | 1.485(6) |
| O(1)-C(3)         | 1.209(4) |
| C(3)-C(2)         | 1.512(5) |
| C(15)-O(2)        | 1.197(4) |
| C(15)-C(10)       | 1.534(5) |
| C(11)-N(1)        | 1.131(4) |
| C(11)-C(10)       | 1.479(5) |
| C(1)-C(2)         | 1.328(5) |
| C(1)-C(4)         | 1.467(5) |
| C(4)-C(5)         | 1.379(5) |
| C(4)-C(9)         | 1.389(5) |
| C(2)-C(10)        | 1.535(5) |
| C(19)-C(20)       | 1.389(6) |
| C(10)-C(12)       | 1.558(5) |
| C(9)-C(8)         | 1.385(5) |
| C(7)-C(6)         | 1.366(6) |
| C(7)-C(8)         | 1.371(6) |
| C(12)-C(13)       | 1.511(6) |
| C(12)-C(14)       | 1.529(5) |
| C(6)-C(5)         | 1.368(5) |
| C(21)-C(22)       | 1.355(7) |
| C(21)-C(20)       | 1.362(6) |
| C(23)-C(22)       | 1.367(6) |
| C(16)-C(17)       | 1.356(7) |
| C(15)-O(3)-C(16)  | 114.9(4) |
| C(19)-C(18)-C(23) | 118.3(4) |
| C(19)-C(18)-C(3)  | 122.9(4) |
| C(23)-C(18)-C(3)  | 118.8(4) |
| O(1)-C(3)-C(18)   | 120.7(3) |
| O(1)-C(3)-C(2)    | 120.4(4) |
| C(18)-C(3)-C(2)   | 118.9(4) |
| O(2)-C(15)-O(3)   | 124.7(4) |
| O(2)-C(15)-C(10)  | 120.9(4) |
| O(3)-C(15)-C(10)  | 114.4(4) |

|                   |          |
|-------------------|----------|
| N(1)-C(11)-C(10)  | 175.8(4) |
| C(2)-C(1)-C(4)    | 128.0(3) |
| C(5)-C(4)-C(9)    | 118.3(4) |
| C(5)-C(4)-C(1)    | 118.9(3) |
| C(9)-C(4)-C(1)    | 122.8(4) |
| C(1)-C(2)-C(3)    | 120.7(3) |
| C(1)-C(2)-C(10)   | 122.7(3) |
| C(3)-C(2)-C(10)   | 116.5(3) |
| C(18)-C(19)-C(20) | 120.8(4) |
| C(11)-C(10)-C(15) | 110.8(3) |
| C(11)-C(10)-C(2)  | 110.8(3) |
| C(15)-C(10)-C(2)  | 106.6(3) |
| C(11)-C(10)-C(12) | 107.4(3) |
| C(15)-C(10)-C(12) | 107.7(3) |
| C(2)-C(10)-C(12)  | 113.6(3) |
| C(8)-C(9)-C(4)    | 120.3(4) |
| C(6)-C(7)-C(8)    | 121.6(4) |
| C(6)-C(7)-Br(1)   | 119.1(4) |
| C(8)-C(7)-Br(1)   | 119.3(4) |
| C(13)-C(12)-C(14) | 111.9(4) |
| C(13)-C(12)-C(10) | 111.6(3) |
| C(14)-C(12)-C(10) | 111.1(3) |
| C(7)-C(6)-C(5)    | 118.6(4) |
| C(22)-C(21)-C(20) | 121.5(5) |
| C(22)-C(21)-Cl(1) | 119.8(4) |
| C(20)-C(21)-Cl(1) | 118.6(5) |
| C(7)-C(8)-C(9)    | 119.2(4) |
| C(6)-C(5)-C(4)    | 122.0(4) |
| C(22)-C(23)-C(18) | 120.8(4) |
| C(21)-C(22)-C(23) | 119.9(4) |
| C(21)-C(20)-C(19) | 118.7(5) |
| C(17)-C(16)-O(3)  | 109.6(4) |

---

Symmetry transformations used to generate equivalent atoms:

Table S4. Anisotropic displacement parameters ( $\text{\AA}^2 \times 10^3$ ) for **3b**.

The anisotropic displacement factor exponent takes the form:

$$-2 \pi^2 [ h^2 a^{*2} U_{11} + \dots + 2 h k a^* b^* U_{12} ]$$

|       | U11    | U22    | U33    | U23    | U13    | U12    |
|-------|--------|--------|--------|--------|--------|--------|
| Br(1) | 65(1)  | 157(1) | 141(1) | -26(1) | 25(1)  | -23(1) |
| Cl(1) | 181(2) | 146(1) | 120(1) | -53(1) | -9(1)  | -16(1) |
| O(3)  | 100(2) | 96(2)  | 57(2)  | -5(2)  | 9(2)   | 39(2)  |
| C(18) | 48(2)  | 99(4)  | 42(2)  | 10(2)  | 4(2)   | 8(2)   |
| O(1)  | 81(2)  | 99(2)  | 70(2)  | 29(2)  | -14(2) | 10(2)  |
| C(3)  | 48(2)  | 94(4)  | 47(2)  | 13(2)  | 3(2)   | 9(2)   |
| C(15) | 56(2)  | 95(3)  | 49(3)  | -4(2)  | 11(2)  | 1(2)   |
| O(2)  | 89(2)  | 146(3) | 52(2)  | -21(2) | 2(2)   | 24(2)  |
| C(11) | 51(2)  | 72(3)  | 48(2)  | 3(2)   | 7(2)   | 14(2)  |
| C(1)  | 52(2)  | 77(3)  | 44(2)  | 1(2)   | 0(2)   | 8(2)   |
| C(4)  | 55(2)  | 78(3)  | 44(2)  | -8(2)  | 5(2)   | 4(2)   |
| C(2)  | 52(2)  | 71(3)  | 44(2)  | 3(2)   | 3(2)   | 11(2)  |
| C(19) | 74(3)  | 108(4) | 52(3)  | -2(3)  | -4(2)  | 10(3)  |
| C(10) | 50(2)  | 73(3)  | 41(2)  | 4(2)   | 6(2)   | 9(2)   |
| C(9)  | 61(3)  | 93(3)  | 58(3)  | -4(2)  | 10(2)  | 16(2)  |
| C(7)  | 58(3)  | 96(4)  | 71(3)  | -24(3) | 9(2)   | -12(2) |
| C(12) | 61(3)  | 91(3)  | 58(3)  | 17(2)  | -1(2)  | 3(2)   |
| C(6)  | 75(3)  | 100(4) | 69(3)  | 6(2)   | 3(2)   | -15(3) |
| C(21) | 89(3)  | 116(4) | 64(3)  | -25(3) | 4(3)   | -6(3)  |
| N(1)  | 71(2)  | 93(3)  | 52(2)  | 0(2)   | -5(2)  | 11(2)  |
| C(8)  | 57(3)  | 104(4) | 74(3)  | -17(3) | 3(2)   | 18(2)  |
| C(5)  | 59(3)  | 95(3)  | 66(3)  | 6(2)   | 1(2)   | -5(2)  |
| C(23) | 55(2)  | 114(4) | 50(3)  | 9(3)   | 0(2)   | 1(2)   |
| C(22) | 73(3)  | 136(5) | 53(3)  | 1(3)   | -8(2)  | -5(3)  |
| C(14) | 80(3)  | 115(4) | 88(3)  | 25(3)  | 6(2)   | -19(3) |
| C(20) | 102(4) | 94(4)  | 72(3)  | -3(3)  | -1(3)  | 11(3)  |
| C(16) | 153(5) | 147(5) | 77(4)  | -32(4) | 17(3)  | 77(4)  |
| C(13) | 108(4) | 78(3)  | 113(4) | 12(3)  | 11(3)  | 16(3)  |
| C(17) | 208(7) | 127(5) | 116(5) | -23(4) | 26(5)  | 71(5)  |

Table S5. Hydrogen coordinates ( $\times 10^4$ ) and isotropic displacement parameters ( $\text{\AA}^2 \times 10^3$ ) for **3b**.

|        | x     | y     | z    | U(eq) |
|--------|-------|-------|------|-------|
| H(1)   | 8269  | 1355  | 134  | 70    |
| H(19)  | 8504  | 3803  | 1332 | 94    |
| H(9)   | 9491  | 220   | 1059 | 85    |
| H(12)  | 7825  | -860  | 1881 | 85    |
| H(6)   | 9785  | 3879  | -448 | 98    |
| H(8)   | 10389 | 786   | 838  | 94    |
| H(5)   | 8895  | 3274  | -249 | 88    |
| H(23)  | 9361  | 1566  | 2814 | 88    |
| H(22)  | 9654  | 3716  | 3321 | 106   |
| H(14A) | 6801  | -1153 | 1050 | 142   |
| H(14B) | 6870  | -358  | 1757 | 142   |
| H(14C) | 6972  | -2065 | 1713 | 142   |
| H(20)  | 8804  | 5972  | 1853 | 108   |
| H(16A) | 6710  | 3415  | 2015 | 151   |
| H(16B) | 7236  | 4386  | 1895 | 151   |
| H(13A) | 7813  | -2984 | 1248 | 150   |
| H(13B) | 8266  | -1874 | 1032 | 150   |
| H(13C) | 7687  | -2059 | 579  | 150   |
| H(17A) | 6788  | 5158  | 934  | 224   |
| H(17B) | 6464  | 5546  | 1557 | 224   |
| H(17C) | 6260  | 4226  | 1079 | 224   |



Ethyl (Z)-2-cyano-2-isopropyl-3-(4-methoxybenzoyl)-4-(m-tolyl)but-3-enoate (**3h**)

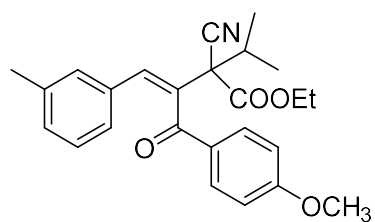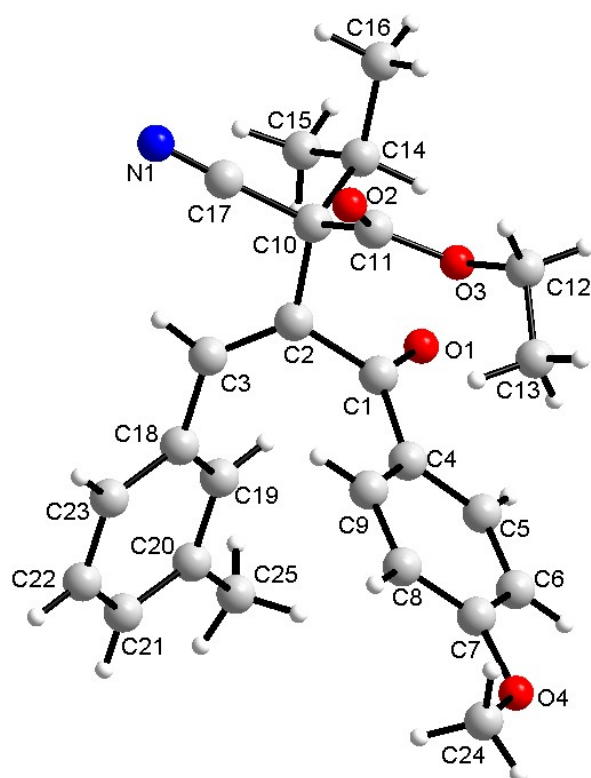

Table S6. Crystal data and structure refinement for **3h**.

|                                   |                                                                                                               |
|-----------------------------------|---------------------------------------------------------------------------------------------------------------|
| Identification code               | <b>3h</b>                                                                                                     |
| Empirical formula                 | C <sub>25</sub> H <sub>27</sub> NO <sub>4</sub>                                                               |
| Formula weight                    | 405.48                                                                                                        |
| Temperature                       | 296 K                                                                                                         |
| Wavelength                        | 0.71073 Å                                                                                                     |
| Crystal system, space group       | Monoclinic, P2(1)/c                                                                                           |
| Unit cell dimensions              | a = 10.129(6) Å    alpha = 90°.<br>b = 15.539(9) Å    beta = 105.482(17)°.<br>c = 15.252(9) Å    gamma = 90°. |
| Volume                            | 2313(2) Å <sup>3</sup>                                                                                        |
| Z, Calculated density             | 4, 1.164 Mg/m <sup>3</sup>                                                                                    |
| Absorption coefficient            | 0.078 mm <sup>-1</sup>                                                                                        |
| F(000)                            | 864                                                                                                           |
| Crystal size                      | 0.35 x 0.33 x 0.3 mm                                                                                          |
| Theta range for data collection   | 1.91 to 25.00°.                                                                                               |
| Limiting indices                  | -11<=h<=12, -16<=k<=18, -18<=l<=18                                                                            |
| Reflections collected / unique    | 18808 / 4069 [R(int) = 0.0761]                                                                                |
| Completeness to theta = 25.00     | 99.6 %                                                                                                        |
| Refinement method                 | Full-matrix least-squares on F <sup>2</sup>                                                                   |
| Data / restraints / parameters    | 4054 / 13 / 276                                                                                               |
| Goodness-of-fit on F <sup>2</sup> | 1.090                                                                                                         |
| Final R indices [I>2sigma(I)]     | R1 = 0.0683, wR2 = 0.1954                                                                                     |
| R indices (all data)              | R1 = 0.1042, wR2 = 0.2262                                                                                     |
| Largest diff. peak and hole       | 0.636 and -0.447 e.Å <sup>-3</sup>                                                                            |

Table S7. Atomic coordinates ( $\times 10^4$ ) and equivalent isotropic displacement parameters ( $\text{\AA}^2 \times 10^3$ ) for **3h**.

U(eq) is defined as one third of the trace of the orthogonalized Uij tensor.

|       | x        | y        | z        | U(eq)  |
|-------|----------|----------|----------|--------|
| O(1)  | -611(2)  | 1976(1)  | 7030(1)  | 58(1)  |
| C(2)  | -832(3)  | 562(2)   | 7569(2)  | 45(1)  |
| C(4)  | 1323(3)  | 1514(2)  | 8190(2)  | 45(1)  |
| C(1)  | -63(3)   | 1403(2)  | 7559(2)  | 45(1)  |
| O(4)  | 5109(2)  | 2066(2)  | 10008(2) | 78(1)  |
| O(3)  | -1293(2) | 1694(2)  | 9006(1)  | 72(1)  |
| C(9)  | 1911(3)  | 929(2)   | 8878(2)  | 52(1)  |
| C(3)  | -420(3)  | -175(2)  | 7274(2)  | 49(1)  |
| C(7)  | 3863(3)  | 1839(2)  | 9433(2)  | 56(1)  |
| C(5)  | 2061(3)  | 2269(2)  | 8133(2)  | 53(1)  |
| C(19) | 1058(3)  | 280(2)   | 6266(2)  | 54(1)  |
| C(8)  | 3170(3)  | 1083(2)  | 9500(2)  | 57(1)  |
| C(10) | -2150(3) | 620(2)   | 7896(2)  | 51(1)  |
| C(18) | 754(3)   | -306(2)  | 6882(2)  | 49(1)  |
| C(6)  | 3305(3)  | 2427(2)  | 8740(2)  | 58(1)  |
| C(20) | 2161(3)  | 149(2)   | 5891(2)  | 59(1)  |
| C(17) | -2791(3) | -242(2)  | 7852(2)  | 65(1)  |
| N(1)  | -3324(3) | -896(2)  | 7793(3)  | 92(1)  |
| C(23) | 1555(3)  | -1044(2) | 7095(2)  | 64(1)  |
| O(2)  | -1993(4) | 479(2)   | 9498(2)  | 122(1) |
| C(14) | -3242(3) | 1255(2)  | 7288(2)  | 61(1)  |
| C(21) | 2945(3)  | -585(3)  | 6146(3)  | 73(1)  |
| C(11) | -1800(3) | 906(2)   | 8898(2)  | 64(1)  |
| C(22) | 2652(4)  | -1173(3) | 6736(3)  | 78(1)  |
| C(25) | 2449(4)  | 793(3)   | 5225(3)  | 85(1)  |
| C(15) | -3605(4) | 996(3)   | 6278(2)  | 77(1)  |
| C(24) | 5700(4)  | 1524(3)  | 10770(3) | 92(1)  |
| C(16) | -4520(4) | 1321(3)  | 7635(3)  | 91(1)  |
| C(13) | 434(7)   | 2057(6)  | 10358(5) | 199(3) |
| C(12) | -965(5)  | 2073(3)  | 9919(3)  | 99(1)  |

Table S8. Bond lengths [Å] and angles [°] for **3h**.

---

|                 |          |
|-----------------|----------|
| O(1)-C(1)       | 1.230(3) |
| C(2)-C(3)       | 1.337(4) |
| C(2)-C(1)       | 1.524(4) |
| C(2)-C(10)      | 1.547(4) |
| C(4)-C(9)       | 1.397(4) |
| C(4)-C(5)       | 1.406(4) |
| C(4)-C(1)       | 1.484(4) |
| O(4)-C(7)       | 1.377(4) |
| O(4)-C(24)      | 1.430(5) |
| O(3)-C(11)      | 1.321(4) |
| O(3)-C(12)      | 1.466(4) |
| C(9)-C(8)       | 1.393(4) |
| C(3)-C(18)      | 1.481(4) |
| C(7)-C(8)       | 1.386(4) |
| C(7)-C(6)       | 1.396(4) |
| C(5)-C(6)       | 1.372(4) |
| C(19)-C(20)     | 1.400(4) |
| C(19)-C(18)     | 1.399(4) |
| C(10)-C(17)     | 1.483(4) |
| C(10)-C(11)     | 1.539(5) |
| C(10)-C(14)     | 1.585(4) |
| C(18)-C(23)     | 1.393(4) |
| C(20)-C(21)     | 1.385(5) |
| C(20)-C(25)     | 1.508(5) |
| C(17)-N(1)      | 1.142(4) |
| C(23)-C(22)     | 1.378(5) |
| O(2)-C(11)      | 1.188(4) |
| C(14)-C(16)     | 1.527(5) |
| C(14)-C(15)     | 1.539(5) |
| C(21)-C(22)     | 1.369(5) |
| C(13)-C(12)     | 1.397(6) |
| C(3)-C(2)-C(1)  | 121.6(2) |
| C(3)-C(2)-C(10) | 122.1(2) |
| C(1)-C(2)-C(10) | 116.2(2) |
| C(9)-C(4)-C(5)  | 117.5(3) |
| C(9)-C(4)-C(1)  | 123.4(2) |
| C(5)-C(4)-C(1)  | 118.9(2) |
| O(1)-C(1)-C(4)  | 121.6(2) |
| O(1)-C(1)-C(2)  | 119.0(2) |
| C(4)-C(1)-C(2)  | 119.4(2) |

|                   |          |
|-------------------|----------|
| C(7)-O(4)-C(24)   | 118.7(3) |
| C(11)-O(3)-C(12)  | 118.3(3) |
| C(8)-C(9)-C(4)    | 122.0(3) |
| C(2)-C(3)-C(18)   | 127.6(2) |
| O(4)-C(7)-C(8)    | 124.4(3) |
| O(4)-C(7)-C(6)    | 115.6(3) |
| C(8)-C(7)-C(6)    | 120.0(3) |
| C(6)-C(5)-C(4)    | 121.0(3) |
| C(20)-C(19)-C(18) | 121.5(3) |
| C(7)-C(8)-C(9)    | 119.0(3) |
| C(17)-C(10)-C(11) | 106.7(3) |
| C(17)-C(10)-C(2)  | 109.8(2) |
| C(11)-C(10)-C(2)  | 110.3(2) |
| C(17)-C(10)-C(14) | 107.9(3) |
| C(11)-C(10)-C(14) | 109.9(2) |
| C(2)-C(10)-C(14)  | 112.1(2) |
| C(23)-C(18)-C(19) | 118.2(3) |
| C(23)-C(18)-C(3)  | 120.0(3) |
| C(19)-C(18)-C(3)  | 121.7(3) |
| C(5)-C(6)-C(7)    | 120.5(3) |
| C(21)-C(20)-C(19) | 117.7(3) |
| C(21)-C(20)-C(25) | 122.4(3) |
| C(19)-C(20)-C(25) | 119.9(3) |
| N(1)-C(17)-C(10)  | 177.5(4) |
| C(22)-C(23)-C(18) | 120.5(3) |
| C(16)-C(14)-C(15) | 111.4(3) |
| C(16)-C(14)-C(10) | 111.3(3) |
| C(15)-C(14)-C(10) | 111.4(3) |
| C(22)-C(21)-C(20) | 121.7(3) |
| O(2)-C(11)-O(3)   | 124.0(3) |
| O(2)-C(11)-C(10)  | 124.2(3) |
| O(3)-C(11)-C(10)  | 111.7(3) |
| C(21)-C(22)-C(23) | 120.2(3) |
| C(13)-C(12)-O(3)  | 113.0(4) |

---

Symmetry transformations used to generate equivalent atoms:

Table S9. Anisotropic displacement parameters ( $\text{\AA}^2 \times 10^3$ ) for **3h**.

The anisotropic displacement factor exponent takes the form:

$$-2 \pi^2 [ h^2 a^{*2} U_{11} + \dots + 2 h k a^* b^* U_{12} ]$$

|       | U11    | U22    | U33    | U23     | U13   | U12    |
|-------|--------|--------|--------|---------|-------|--------|
| O(1)  | 66(1)  | 49(1)  | 60(1)  | 13(1)   | 17(1) | 1(1)   |
| C(2)  | 53(2)  | 43(2)  | 41(2)  | 1(1)    | 15(1) | -4(1)  |
| C(4)  | 57(2)  | 39(1)  | 41(2)  | -1(1)   | 20(1) | -4(1)  |
| C(1)  | 60(2)  | 40(2)  | 40(2)  | 2(1)    | 22(1) | 2(1)   |
| O(4)  | 70(1)  | 83(2)  | 72(2)  | -2(1)   | 3(1)  | -19(1) |
| O(3)  | 97(2)  | 75(2)  | 51(1)  | -17(1)  | 28(1) | -18(1) |
| C(9)  | 66(2)  | 42(2)  | 50(2)  | 2(1)    | 18(2) | -7(1)  |
| C(3)  | 57(2)  | 44(2)  | 49(2)  | -2(1)   | 18(1) | -8(1)  |
| C(7)  | 59(2)  | 60(2)  | 52(2)  | -10(2)  | 18(1) | -6(1)  |
| C(5)  | 66(2)  | 40(2)  | 56(2)  | 4(1)    | 22(2) | -4(1)  |
| C(19) | 60(2)  | 52(2)  | 52(2)  | -6(1)   | 17(1) | -1(1)  |
| C(8)  | 67(2)  | 52(2)  | 50(2)  | 3(1)    | 12(2) | -3(2)  |
| C(10) | 60(2)  | 46(2)  | 53(2)  | -4(1)   | 24(1) | -7(1)  |
| C(18) | 55(2)  | 46(2)  | 48(2)  | -8(1)   | 15(1) | -7(1)  |
| C(6)  | 68(2)  | 45(2)  | 64(2)  | -2(2)   | 20(2) | -13(1) |
| C(20) | 60(2)  | 71(2)  | 48(2)  | -11(2)  | 18(1) | -14(2) |
| C(17) | 68(2)  | 56(2)  | 83(2)  | -10(2)  | 42(2) | -10(2) |
| N(1)  | 96(2)  | 65(2)  | 133(3) | -17(2)  | 64(2) | -20(2) |
| C(23) | 68(2)  | 53(2)  | 73(2)  | 2(2)    | 22(2) | 2(2)   |
| O(2)  | 210(4) | 104(2) | 68(2)  | 3(2)    | 63(2) | -50(2) |
| C(14) | 59(2)  | 62(2)  | 66(2)  | -8(2)   | 21(2) | 1(2)   |
| C(21) | 58(2)  | 88(3)  | 78(2)  | -15(2)  | 26(2) | 4(2)   |
| C(11) | 81(2)  | 63(2)  | 58(2)  | 0(2)    | 35(2) | -10(2) |
| C(22) | 73(2)  | 72(2)  | 93(3)  | -1(2)   | 30(2) | 14(2)  |
| C(25) | 86(2)  | 104(3) | 73(2)  | 1(2)    | 37(2) | -16(2) |
| C(15) | 74(2)  | 88(3)  | 63(2)  | -4(2)   | 9(2)  | 9(2)   |
| C(24) | 73(2)  | 121(3) | 72(3)  | 4(2)    | 1(2)  | -11(2) |
| C(16) | 73(2)  | 102(3) | 106(3) | -14(3)  | 38(2) | 14(2)  |
| C(13) | 162(5) | 296(8) | 136(5) | -129(5) | 36(4) | 2(5)   |
| C(12) | 116(3) | 124(3) | 63(2)  | -36(2)  | 31(2) | -27(3) |

Table S10. Hydrogen coordinates ( $\times 10^4$ ) and isotropic displacement parameters ( $\text{\AA}^2 \times 10^3$ ) for **3h**.

|        | x     | y     | z     | U(eq) |
|--------|-------|-------|-------|-------|
| H(9)   | 1447  | 421   | 8922  | 63    |
| H(3)   | -932  | -662  | 7319  | 59    |
| H(5)   | 1701  | 2668  | 7678  | 63    |
| H(19)  | 514   | 767   | 6103  | 65    |
| H(8)   | 3541  | 685   | 9955  | 69    |
| H(6)   | 3781  | 2928  | 8690  | 70    |
| H(23)  | 1349  | -1453 | 7483  | 77    |
| H(14)  | -2825 | 1828  | 7339  | 74    |
| H(21)  | 3690  | -681  | 5911  | 88    |
| H(22)  | 3195  | -1660 | 6895  | 94    |
| H(25A) | 3105  | 557   | 4939  | 127   |
| H(25B) | 2810  | 1311  | 5542  | 127   |
| H(25C) | 1615  | 921   | 4770  | 127   |
| H(15A) | -3930 | 413   | 6214  | 116   |
| H(15B) | -2806 | 1043  | 6057  | 116   |
| H(15C) | -4308 | 1371  | 5934  | 116   |
| H(24A) | 5079  | 1473  | 11145 | 138   |
| H(24B) | 6547  | 1770  | 11118 | 138   |
| H(24C) | 5871  | 964   | 10557 | 138   |
| H(16A) | -5154 | 1719  | 7263  | 136   |
| H(16B) | -4268 | 1520  | 8253  | 136   |
| H(16C) | -4943 | 765   | 7606  | 136   |
| H(13A) | 748   | 1471  | 10425 | 298   |
| H(13B) | 591   | 2318  | 10947 | 298   |
| H(13C) | 926   | 2369  | 10002 | 298   |
| H(12A) | -1281 | 2665  | 9872  | 119   |
| H(12B) | -1456 | 1763  | 10285 | 119   |

Methyl

(Z)-3-(4-bromobenzoyl)-4-(2-chlorophenyl)-2-cyano-2-isopropylbut-3-enoate (**3m**)

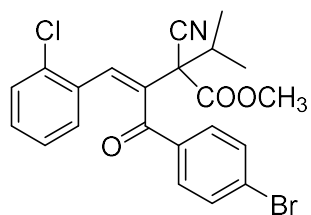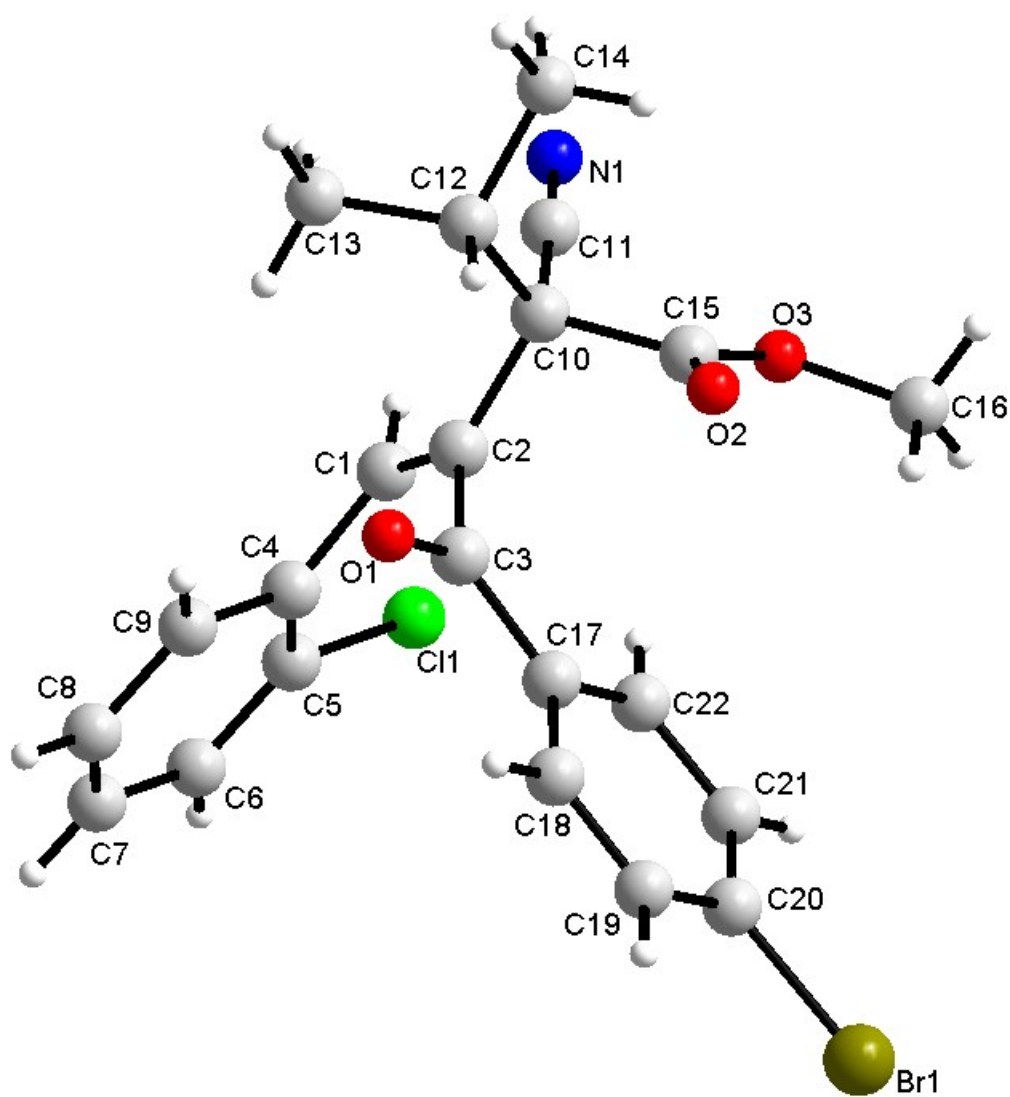



Table S11. Crystal data and structure refinement for **3m**.

|                                   |                                                                                                                |
|-----------------------------------|----------------------------------------------------------------------------------------------------------------|
| Identification code               | <b>3m</b>                                                                                                      |
| Empirical formula                 | C <sub>22</sub> H <sub>19</sub> BrClNO <sub>3</sub>                                                            |
| Formula weight                    | 460.73                                                                                                         |
| Temperature                       | 296 K                                                                                                          |
| Wavelength                        | 0.71073 Å                                                                                                      |
| Crystal system, space group       | Monoclinic, P2(1)/n                                                                                            |
| Unit cell dimensions              | a = 15.6584(17) Å    alpha = 90°.<br>b = 7.2134(7) Å    beta = 102.956(3)°.<br>c = 19.131(2) Å    gamma = 90°. |
| Volume                            | 2105.8(4) Å <sup>3</sup>                                                                                       |
| Z, Calculated density             | 4, 1.453 Mg/m <sup>3</sup>                                                                                     |
| Absorption coefficient            | 2.101 mm <sup>-1</sup>                                                                                         |
| F(000)                            | 936                                                                                                            |
| Crystal size                      | 0.35 x 0.33 x 0.3 mm                                                                                           |
| Theta range for data collection   | 1.52 to 27.49°.                                                                                                |
| Limiting indices                  | -20<=h<=19, -9<=k<=9, -24<=l<=22                                                                               |
| Reflections collected / unique    | 22317 / 4841 [R(int) = 0.0459]                                                                                 |
| Completeness to theta = 27.49     | 99.6 %                                                                                                         |
| Refinement method                 | Full-matrix least-squares on F <sup>2</sup>                                                                    |
| Data / restraints / parameters    | 4822 / 0 / 256                                                                                                 |
| Goodness-of-fit on F <sup>2</sup> | 1.053                                                                                                          |
| Final R indices [I>2sigma(I)]     | R1 = 0.0406, wR2 = 0.1014                                                                                      |
| R indices (all data)              | R1 = 0.0864, wR2 = 0.1269                                                                                      |
| Largest diff. peak and hole       | 0.215 and -0.327 e.Å <sup>-3</sup>                                                                             |

Table S12. Atomic coordinates ( $\times 10^4$ ) and equivalent isotropic displacement parameters ( $\text{\AA}^2 \times 10^3$ ) for **3m**.

U(eq) is defined as one third of the trace of the orthogonalized Uij tensor.

|       | x        | y        | z        | U(eq)  |
|-------|----------|----------|----------|--------|
| Br(1) | 4594(1)  | 4534(1)  | 1121(1)  | 87(1)  |
| Cl(1) | 8210(1)  | 5296(1)  | -955(1)  | 77(1)  |
| C(2)  | 8198(1)  | 9537(3)  | 499(1)   | 39(1)  |
| C(1)  | 8337(1)  | 8883(3)  | -114(1)  | 41(1)  |
| C(5)  | 7603(2)  | 7271(3)  | -1246(1) | 45(1)  |
| C(4)  | 7699(1)  | 8814(3)  | -805(1)  | 40(1)  |
| O(1)  | 7129(1)  | 11797(2) | 554(1)   | 71(1)  |
| C(9)  | 7210(2)  | 10378(4) | -1076(1) | 54(1)  |
| O(3)  | 8895(2)  | 7231(3)  | 1937(1)  | 83(1)  |
| C(17) | 6647(1)  | 8749(3)  | 657(1)   | 42(1)  |
| C(19) | 5215(2)  | 8086(4)  | 855(2)   | 62(1)  |
| C(18) | 5824(2)  | 9325(4)  | 729(1)   | 53(1)  |
| C(20) | 5426(2)  | 6243(4)  | 917(1)   | 57(1)  |
| C(10) | 8926(2)  | 9813(3)  | 1175(1)  | 45(1)  |
| C(22) | 6831(2)  | 6860(3)  | 704(1)   | 54(1)  |
| O(2)  | 8146(2)  | 9686(4)  | 2111(1)  | 100(1) |
| C(8)  | 6648(2)  | 10361(4) | -1743(2) | 68(1)  |
| C(3)  | 7295(2)  | 10160(3) | 564(1)   | 44(1)  |
| C(7)  | 6560(2)  | 8804(5)  | -2160(1) | 66(1)  |
| C(21) | 6221(2)  | 5615(4)  | 840(2)   | 61(1)  |
| C(12) | 9123(2)  | 11902(4) | 1340(1)  | 60(1)  |
| N(1)  | 10383(2) | 8263(4)  | 1022(1)  | 76(1)  |
| C(11) | 9741(2)  | 8898(4)  | 1087(1)  | 52(1)  |
| C(6)  | 7039(2)  | 7244(4)  | -1915(1) | 59(1)  |
| C(15) | 8624(2)  | 8917(4)  | 1809(1)  | 60(1)  |
| C(16) | 8559(4)  | 6285(6)  | 2498(2)  | 129(2) |
| C(13) | 9304(2)  | 12935(4) | 698(2)   | 78(1)  |
| C(14) | 9887(2)  | 12153(5) | 1988(2)  | 100(1) |

Table S13. Bond lengths [Å] and angles [°] for **3m**.

---

|                 |            |
|-----------------|------------|
| Br(1)-C(20)     | 1.896(3)   |
| Cl(1)-C(5)      | 1.734(2)   |
| C(2)-C(1)       | 1.327(3)   |
| C(2)-C(3)       | 1.515(3)   |
| C(2)-C(10)      | 1.533(3)   |
| C(1)-C(4)       | 1.469(3)   |
| C(5)-C(4)       | 1.384(3)   |
| C(5)-C(6)       | 1.384(3)   |
| C(4)-C(9)       | 1.396(3)   |
| O(1)-C(3)       | 1.209(3)   |
| C(9)-C(8)       | 1.378(4)   |
| O(3)-C(15)      | 1.293(4)   |
| O(3)-C(16)      | 1.465(4)   |
| C(17)-C(18)     | 1.389(3)   |
| C(17)-C(22)     | 1.392(3)   |
| C(17)-C(3)      | 1.476(3)   |
| C(19)-C(18)     | 1.367(4)   |
| C(19)-C(20)     | 1.369(4)   |
| C(20)-C(21)     | 1.364(4)   |
| C(10)-C(11)     | 1.479(4)   |
| C(10)-C(15)     | 1.540(4)   |
| C(10)-C(12)     | 1.556(3)   |
| C(22)-C(21)     | 1.377(4)   |
| O(2)-C(15)      | 1.182(3)   |
| C(8)-C(7)       | 1.366(4)   |
| C(7)-C(6)       | 1.375(4)   |
| C(12)-C(13)     | 1.515(4)   |
| C(12)-C(14)     | 1.528(4)   |
| N(1)-C(11)      | 1.137(3)   |
| C(1)-C(2)-C(3)  | 121.3(2)   |
| C(1)-C(2)-C(10) | 123.5(2)   |
| C(3)-C(2)-C(10) | 115.10(19) |
| C(2)-C(1)-C(4)  | 126.5(2)   |
| C(4)-C(5)-C(6)  | 122.3(2)   |
| C(4)-C(5)-Cl(1) | 119.26(17) |
| C(6)-C(5)-Cl(1) | 118.43(19) |
| C(5)-C(4)-C(9)  | 116.7(2)   |
| C(5)-C(4)-C(1)  | 122.3(2)   |
| C(9)-C(4)-C(1)  | 120.8(2)   |
| C(8)-C(9)-C(4)  | 121.2(3)   |

|                   |            |
|-------------------|------------|
| C(15)-O(3)-C(16)  | 114.9(3)   |
| C(18)-C(17)-C(22) | 118.0(2)   |
| C(18)-C(17)-C(3)  | 119.0(2)   |
| C(22)-C(17)-C(3)  | 123.0(2)   |
| C(18)-C(19)-C(20) | 119.1(2)   |
| C(19)-C(18)-C(17) | 121.4(2)   |
| C(21)-C(20)-C(19) | 121.4(2)   |
| C(21)-C(20)-Br(1) | 119.5(2)   |
| C(19)-C(20)-Br(1) | 119.0(2)   |
| C(11)-C(10)-C(2)  | 110.15(19) |
| C(11)-C(10)-C(15) | 109.1(2)   |
| C(2)-C(10)-C(15)  | 107.90(19) |
| C(11)-C(10)-C(12) | 108.6(2)   |
| C(2)-C(10)-C(12)  | 111.89(19) |
| C(15)-C(10)-C(12) | 109.2(2)   |
| C(21)-C(22)-C(17) | 120.5(2)   |
| C(7)-C(8)-C(9)    | 120.5(3)   |
| O(1)-C(3)-C(17)   | 121.6(2)   |
| O(1)-C(3)-C(2)    | 119.3(2)   |
| C(17)-C(3)-C(2)   | 119.01(19) |
| C(8)-C(7)-C(6)    | 119.9(2)   |
| C(20)-C(21)-C(22) | 119.5(2)   |
| C(13)-C(12)-C(14) | 110.1(3)   |
| C(13)-C(12)-C(10) | 112.1(2)   |
| C(14)-C(12)-C(10) | 111.2(2)   |
| N(1)-C(11)-C(10)  | 177.2(3)   |
| C(7)-C(6)-C(5)    | 119.3(2)   |
| O(2)-C(15)-O(3)   | 124.5(3)   |
| O(2)-C(15)-C(10)  | 121.9(3)   |
| O(3)-C(15)-C(10)  | 113.5(2)   |

---

Symmetry transformations used to generate equivalent atoms:

Table S14. Anisotropic displacement parameters ( $\text{\AA}^2 \times 10^3$ ) for **3m**.

The anisotropic displacement factor exponent takes the form:

$$-2 \pi^2 [ h^2 a^{*2} U_{11} + \dots + 2 h k a^* b^* U_{12} ]$$

|       | U11    | U22    | U33    | U23    | U13    | U12    |
|-------|--------|--------|--------|--------|--------|--------|
| Br(1) | 76(1)  | 108(1) | 87(1)  | -13(1) | 35(1)  | -39(1) |
| Cl(1) | 93(1)  | 54(1)  | 75(1)  | -4(1)  | 4(1)   | 15(1)  |
| C(2)  | 35(1)  | 41(1)  | 40(1)  | 1(1)   | 8(1)   | 1(1)   |
| C(1)  | 32(1)  | 48(1)  | 42(1)  | 3(1)   | 8(1)   | 3(1)   |
| C(5)  | 41(1)  | 52(1)  | 44(1)  | 0(1)   | 10(1)  | -3(1)  |
| C(4)  | 33(1)  | 49(1)  | 37(1)  | 0(1)   | 8(1)   | -2(1)  |
| O(1)  | 61(1)  | 48(1)  | 109(2) | -5(1)  | 31(1)  | 9(1)   |
| C(9)  | 51(2)  | 57(2)  | 50(2)  | 0(1)   | 3(1)   | 7(1)   |
| O(3)  | 113(2) | 76(1)  | 70(1)  | 19(1)  | 43(1)  | 3(1)   |
| C(17) | 34(1)  | 52(1)  | 40(1)  | -7(1)  | 8(1)   | 3(1)   |
| C(19) | 40(1)  | 84(2)  | 67(2)  | -4(2)  | 20(1)  | 3(1)   |
| C(18) | 43(1)  | 61(2)  | 56(2)  | -1(1)  | 14(1)  | 12(1)  |
| C(20) | 51(2)  | 72(2)  | 52(2)  | -11(1) | 17(1)  | -13(1) |
| C(10) | 42(1)  | 56(1)  | 35(1)  | 2(1)   | 6(1)   | 1(1)   |
| C(22) | 45(1)  | 54(1)  | 67(2)  | -6(1)  | 22(1)  | 4(1)   |
| O(2)  | 116(2) | 125(2) | 79(2)  | 16(1)  | 61(2)  | 29(2)  |
| C(8)  | 62(2)  | 80(2)  | 56(2)  | 13(2)  | 0(2)   | 16(2)  |
| C(3)  | 43(1)  | 46(1)  | 43(1)  | -6(1)  | 8(1)   | 5(1)   |
| C(7)  | 53(2)  | 99(2)  | 40(1)  | 6(2)   | -1(1)  | 0(2)   |
| C(21) | 61(2)  | 50(1)  | 78(2)  | -7(1)  | 27(2)  | -6(1)  |
| C(12) | 56(2)  | 65(2)  | 55(2)  | -7(1)  | 1(1)   | -4(1)  |
| N(1)  | 50(1)  | 103(2) | 73(2)  | 5(2)   | 9(1)   | 16(1)  |
| C(11) | 44(1)  | 69(2)  | 41(1)  | 8(1)   | 3(1)   | 3(1)   |
| C(6)  | 55(2)  | 76(2)  | 43(2)  | -13(1) | 8(1)   | -14(1) |
| C(15) | 58(2)  | 81(2)  | 41(1)  | 2(1)   | 9(1)   | -1(2)  |
| C(16) | 192(5) | 114(3) | 103(3) | 39(3)  | 82(3)  | -10(3) |
| C(13) | 86(2)  | 64(2)  | 81(2)  | 6(2)   | 10(2)  | -17(2) |
| C(14) | 97(3)  | 105(3) | 76(2)  | -19(2) | -24(2) | -17(2) |

Table S15. Hydrogen coordinates ( $\times 10^4$ ) and isotropic displacement parameters ( $\text{\AA}^2 \times 10^3$ ) for **3m**.

|        | x     | y     | z     | U(eq) |
|--------|-------|-------|-------|-------|
| H(1)   | 8895  | 8424  | -105  | 49    |
| H(9)   | 7265  | 11453 | -800  | 64    |
| H(19)  | 4665  | 8490  | 897   | 75    |
| H(18)  | 5685  | 10579 | 692   | 64    |
| H(22)  | 7371  | 6435  | 644   | 64    |
| H(8)   | 6327  | 11417 | -1910 | 81    |
| H(7)   | 6177  | 8800  | -2608 | 79    |
| H(21)  | 6351  | 4356  | 878   | 74    |
| H(12)  | 8602  | 12455 | 1459  | 72    |
| H(6)   | 6984  | 6181  | -2197 | 70    |
| H(16A) | 8966  | 6434  | 2951  | 193   |
| H(16B) | 8486  | 4989  | 2385  | 193   |
| H(16C) | 8004  | 6810  | 2525  | 193   |
| H(13A) | 9457  | 14196 | 831   | 118   |
| H(13B) | 8789  | 12915 | 315   | 118   |
| H(13C) | 9780  | 12349 | 543   | 118   |
| H(14A) | 10413 | 11673 | 1877  | 150   |
| H(14B) | 9765  | 11496 | 2391  | 150   |
| H(14C) | 9962  | 13447 | 2102  | 150   |

Ethyl (Z)-3-(4-bromobenzoyl)-4-(2-bromophenyl)-2-(2-chloroethyl)-2-cyanobut-3-enoate (**3p**)

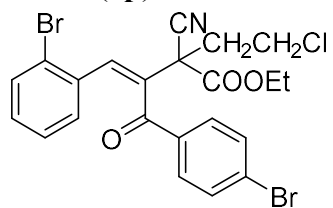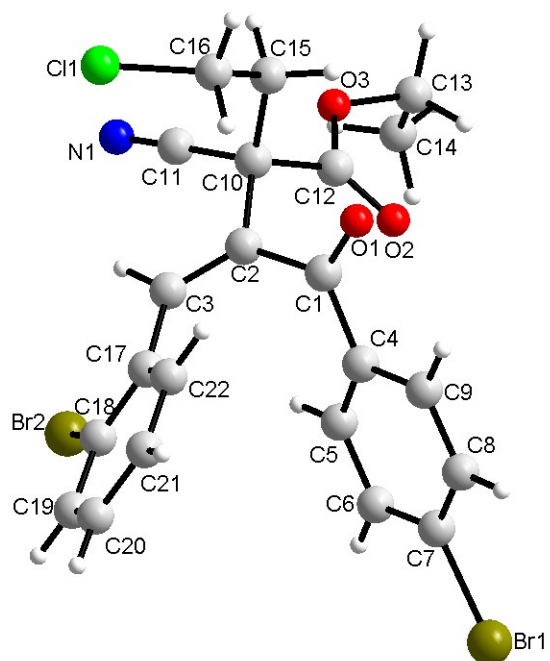

Table S16. Crystal data and structure refinement for **3p**.

|                                   |                                                                                                                              |
|-----------------------------------|------------------------------------------------------------------------------------------------------------------------------|
| Identification code               | <b>3p</b>                                                                                                                    |
| Empirical formula                 | C <sub>22</sub> H <sub>18</sub> Br <sub>2</sub> ClNO <sub>3</sub>                                                            |
| Formula weight                    | 539.62                                                                                                                       |
| Temperature                       | 296 K                                                                                                                        |
| Wavelength                        | 0.71073 Å                                                                                                                    |
| Crystal system, space group       | Triclinic, P-1                                                                                                               |
| Unit cell dimensions              | a = 8.1923(11) Å    alpha = 75.123(4)°.<br>b = 10.0872(14) Å    beta = 88.610(4)°.<br>c = 13.952(2) Å    gamma = 78.866(4)°. |
| Volume                            | 1093.0(3) Å <sup>3</sup>                                                                                                     |
| Z, Calculated density             | 2, 1.640 Mg/m <sup>3</sup>                                                                                                   |
| Absorption coefficient            | 3.853 mm <sup>-1</sup>                                                                                                       |
| F(000)                            | 536                                                                                                                          |
| Crystal size                      | 0.35 x 0.33 x 0.3 mm                                                                                                         |
| Theta range for data collection   | 1.51 to 27.53°.                                                                                                              |
| Limiting indices                  | -10<=h<=10, -13<=k<=13, -18<=l<=17                                                                                           |
| Reflections collected / unique    | 12899 / 5034 [R(int) = 0.0545]                                                                                               |
| Completeness to theta = 27.53     | 96.9 %                                                                                                                       |
| Refinement method                 | Full-matrix least-squares on F <sup>2</sup>                                                                                  |
| Data / restraints / parameters    | 4873 / 1 / 263                                                                                                               |
| Goodness-of-fit on F <sup>2</sup> | 1.028                                                                                                                        |
| Final R indices [I>2sigma(I)]     | R1 = 0.0565, wR2 = 0.1377                                                                                                    |
| R indices (all data)              | R1 = 0.1293, wR2 = 0.1730                                                                                                    |
| Largest diff. peak and hole       | 0.686 and -0.484 e.Å <sup>-3</sup>                                                                                           |



Table S17. Atomic coordinates ( $\times 10^4$ ) and equivalent isotropic displacement parameters ( $\text{\AA}^2 \times 10^3$ ) for **3p**.

U(eq) is defined as one third of the trace of the orthogonalized Uij tensor.

|       | x        | y        | z        | U(eq)  |
|-------|----------|----------|----------|--------|
| Br(2) | 3405(1)  | -746(1)  | 9366(1)  | 67(1)  |
| Br(1) | 6157(1)  | 5987(1)  | 8917(1)  | 70(1)  |
| Cl(1) | -3090(2) | 1280(2)  | 6752(2)  | 102(1) |
| C(3)  | 845(6)   | 1515(5)  | 7925(4)  | 40(1)  |
| O(1)  | -309(5)  | 4851(4)  | 6507(3)  | 71(1)  |
| C(2)  | 793(6)   | 2454(5)  | 7059(4)  | 39(1)  |
| C(1)  | 801(6)   | 3971(5)  | 6969(4)  | 44(1)  |
| C(5)  | 3611(6)  | 3509(5)  | 7832(4)  | 46(1)  |
| C(4)  | 2137(6)  | 4396(5)  | 7461(3)  | 42(1)  |
| C(22) | -129(6)  | 2834(6)  | 9173(4)  | 52(1)  |
| C(6)  | 4800(6)  | 3950(5)  | 8274(4)  | 51(1)  |
| C(17) | 899(6)   | 1723(5)  | 8915(3)  | 40(1)  |
| C(7)  | 4531(6)  | 5317(5)  | 8319(4)  | 47(1)  |
| N(1)  | 989(7)   | -606(5)  | 6383(4)  | 72(1)  |
| C(11) | 810(7)   | 560(6)   | 6245(4)  | 51(1)  |
| C(18) | 1911(6)  | 782(5)   | 9664(4)  | 49(1)  |
| C(10) | 606(7)   | 2079(5)  | 6077(4)  | 47(1)  |
| O(2)  | 2753(6)  | 3420(5)  | 5488(3)  | 77(1)  |
| C(9)  | 1918(6)  | 5785(5)  | 7504(4)  | 47(1)  |
| C(8)  | 3077(7)  | 6246(5)  | 7949(4)  | 53(1)  |
| C(15) | -1087(7) | 2802(6)  | 5492(4)  | 59(2)  |
| C(20) | 887(8)   | 2014(8)  | 10850(4) | 67(2)  |
| C(12) | 1992(8)  | 2566(6)  | 5384(4)  | 59(2)  |
| C(16) | -2645(8) | 2903(7)  | 6147(6)  | 81(2)  |
| C(21) | -134(8)  | 2995(7)  | 10124(5) | 67(2)  |
| C(19) | 1910(7)  | 911(6)   | 10621(4) | 57(2)  |
| O(3)  | 2120(6)  | 1985(5)  | 4640(3)  | 88(1)  |
| C(13) | 3204(12) | 2489(8)  | 3830(6)  | 120(3) |
| C(14) | 4740(11) | 1514(11) | 3932(9)  | 190(6) |

Table S18. Bond lengths [Å] and angles [°] for **3p**.

---

|                 |          |
|-----------------|----------|
| Br(2)-C(18)     | 1.903(5) |
| Br(1)-C(7)      | 1.902(5) |
| Cl(1)-C(16)     | 1.741(7) |
| C(3)-C(2)       | 1.327(6) |
| C(3)-C(17)      | 1.451(7) |
| O(1)-C(1)       | 1.206(5) |
| C(2)-C(1)       | 1.504(6) |
| C(2)-C(10)      | 1.530(7) |
| C(1)-C(4)       | 1.490(7) |
| C(5)-C(6)       | 1.366(7) |
| C(5)-C(4)       | 1.379(7) |
| C(4)-C(9)       | 1.394(6) |
| C(22)-C(21)     | 1.377(7) |
| C(22)-C(17)     | 1.387(7) |
| C(6)-C(7)       | 1.371(7) |
| C(17)-C(18)     | 1.382(7) |
| C(7)-C(8)       | 1.384(7) |
| N(1)-C(11)      | 1.122(6) |
| C(11)-C(10)     | 1.466(7) |
| C(18)-C(19)     | 1.375(7) |
| C(10)-C(12)     | 1.544(8) |
| C(10)-C(15)     | 1.575(7) |
| O(2)-C(12)      | 1.195(7) |
| C(9)-C(8)       | 1.361(7) |
| C(15)-C(16)     | 1.555(9) |
| C(20)-C(19)     | 1.360(8) |
| C(20)-C(21)     | 1.383(9) |
| C(12)-O(3)      | 1.310(7) |
| O(3)-C(13)      | 1.468(8) |
| C(13)-C(14)     | 1.425(8) |
| C(2)-C(3)-C(17) | 128.5(4) |
| C(3)-C(2)-C(1)  | 122.9(4) |
| C(3)-C(2)-C(10) | 121.8(4) |
| C(1)-C(2)-C(10) | 115.2(4) |
| O(1)-C(1)-C(4)  | 119.7(4) |
| O(1)-C(1)-C(2)  | 119.2(4) |
| C(4)-C(1)-C(2)  | 121.0(4) |
| C(6)-C(5)-C(4)  | 121.4(5) |
| C(5)-C(4)-C(9)  | 118.2(5) |
| C(5)-C(4)-C(1)  | 123.6(4) |

|                   |          |
|-------------------|----------|
| C(9)-C(4)-C(1)    | 118.1(4) |
| C(21)-C(22)-C(17) | 121.8(5) |
| C(5)-C(6)-C(7)    | 118.8(5) |
| C(18)-C(17)-C(22) | 116.4(5) |
| C(18)-C(17)-C(3)  | 121.7(5) |
| C(22)-C(17)-C(3)  | 121.8(4) |
| C(8)-C(7)-C(6)    | 121.7(5) |
| C(8)-C(7)-Br(1)   | 117.8(4) |
| C(6)-C(7)-Br(1)   | 120.4(4) |
| N(1)-C(11)-C(10)  | 178.9(6) |
| C(19)-C(18)-C(17) | 122.8(5) |
| C(19)-C(18)-Br(2) | 118.0(4) |
| C(17)-C(18)-Br(2) | 119.2(4) |
| C(11)-C(10)-C(2)  | 110.2(4) |
| C(11)-C(10)-C(12) | 108.0(4) |
| C(2)-C(10)-C(12)  | 108.6(4) |
| C(11)-C(10)-C(15) | 109.0(4) |
| C(2)-C(10)-C(15)  | 114.7(4) |
| C(12)-C(10)-C(15) | 106.1(4) |
| C(8)-C(9)-C(4)    | 121.4(5) |
| C(9)-C(8)-C(7)    | 118.3(5) |
| C(16)-C(15)-C(10) | 115.0(5) |
| C(19)-C(20)-C(21) | 120.1(5) |
| O(2)-C(12)-O(3)   | 125.5(6) |
| O(2)-C(12)-C(10)  | 124.0(5) |
| O(3)-C(12)-C(10)  | 110.3(5) |
| C(15)-C(16)-Cl(1) | 113.2(4) |
| C(22)-C(21)-C(20) | 119.6(6) |
| C(20)-C(19)-C(18) | 119.3(5) |
| C(12)-O(3)-C(13)  | 117.5(6) |
| C(14)-C(13)-O(3)  | 109.1(7) |

---

Symmetry transformations used to generate equivalent atoms:

Table S19. Anisotropic displacement parameters ( $\text{\AA}^2 \times 10^3$ ) for **3p**.

The anisotropic displacement factor exponent takes the form:

$$-2 \pi^2 [ h^2 a^{*2} U_{11} + \dots + 2 h k a^* b^* U_{12} ]$$

|       | U11    | U22     | U33     | U23    | U13    | U12    |
|-------|--------|---------|---------|--------|--------|--------|
| Br(2) | 72(1)  | 51(1)   | 72(1)   | -13(1) | -16(1) | -1(1)  |
| Br(1) | 67(1)  | 72(1)   | 77(1)   | -25(1) | -7(1)  | -24(1) |
| Cl(1) | 84(1)  | 108(2)  | 101(2)  | -7(1)  | 11(1)  | -14(1) |
| C(3)  | 43(3)  | 32(3)   | 46(3)   | -11(2) | 0(2)   | -6(2)  |
| O(1)  | 77(3)  | 37(2)   | 90(3)   | -10(2) | -34(2) | 3(2)   |
| C(2)  | 43(3)  | 34(3)   | 39(3)   | -10(2) | -4(2)  | -4(2)  |
| C(1)  | 53(3)  | 34(3)   | 39(3)   | -5(2)  | -3(2)  | -1(2)  |
| C(5)  | 49(3)  | 30(3)   | 54(3)   | -7(2)  | -1(3)  | -3(2)  |
| C(4)  | 56(3)  | 35(3)   | 33(3)   | -7(2)  | 6(2)   | -6(2)  |
| C(22) | 56(3)  | 54(3)   | 47(3)   | -15(3) | 6(3)   | -11(3) |
| C(6)  | 48(3)  | 39(3)   | 60(4)   | -6(3)  | -6(3)  | -5(2)  |
| C(17) | 44(3)  | 38(3)   | 39(3)   | -5(2)  | 3(2)   | -16(2) |
| C(7)  | 48(3)  | 48(3)   | 49(3)   | -13(3) | 8(2)   | -16(3) |
| N(1)  | 94(4)  | 50(3)   | 71(4)   | -21(3) | -11(3) | -4(3)  |
| C(11) | 66(4)  | 40(3)   | 45(3)   | -13(3) | -9(3)  | 0(3)   |
| C(18) | 49(3)  | 46(3)   | 54(3)   | -13(3) | 4(3)   | -16(2) |
| C(10) | 65(3)  | 31(3)   | 41(3)   | -9(2)  | -3(3)  | -3(2)  |
| O(2)  | 90(3)  | 90(3)   | 60(3)   | -22(2) | 10(2)  | -35(3) |
| C(9)  | 51(3)  | 32(3)   | 52(3)   | -11(2) | -2(3)  | 4(2)   |
| C(8)  | 67(4)  | 40(3)   | 57(4)   | -18(3) | 7(3)   | -14(3) |
| C(15) | 71(4)  | 51(3)   | 48(3)   | -10(3) | -18(3) | 4(3)   |
| C(20) | 70(4)  | 103(5)  | 42(3)   | -32(4) | 14(3)  | -36(4) |
| C(12) | 77(4)  | 51(4)   | 41(3)   | -10(3) | 3(3)   | 0(3)   |
| C(16) | 72(4)  | 69(4)   | 100(5)  | -23(4) | -21(4) | -6(3)  |
| C(21) | 63(4)  | 84(5)   | 66(4)   | -35(4) | 19(3)  | -23(3) |
| C(19) | 63(4)  | 69(4)   | 38(3)   | -3(3)  | -5(3)  | -25(3) |
| O(3)  | 124(4) | 78(3)   | 67(3)   | -30(3) | 35(3)  | -20(3) |
| C(13) | 165(9) | 101(6)  | 77(5)   | -14(5) | 61(6)  | -4(6)  |
| C(14) | 122(8) | 152(10) | 214(13) | 66(9)  | 83(8)  | 10(7)  |

Table S20. Hydrogen coordinates ( $\times 10^4$ ) and isotropic displacement parameters ( $\text{\AA}^2 \times 10^3$ ) for **3p**.

|        | x     | y    | z     | U(eq) |
|--------|-------|------|-------|-------|
| H(3)   | 848   | 585  | 7894  | 48    |
| H(5)   | 3802  | 2572 | 7780  | 55    |
| H(22)  | -849  | 3502 | 8681  | 63    |
| H(6)   | 5796  | 3322 | 8545  | 61    |
| H(9)   | 939   | 6422 | 7216  | 56    |
| H(8)   | 2893  | 7182 | 8004  | 64    |
| H(15A) | -992  | 3757 | 5113  | 71    |
| H(15B) | -1260 | 2275 | 5007  | 71    |
| H(20)  | 874   | 2110 | 11510 | 80    |
| H(16A) | -3618 | 3463 | 5725  | 97    |
| H(16B) | -2464 | 3402 | 6649  | 97    |
| H(21)  | -834  | 3774 | 10280 | 81    |
| H(19)  | 2616  | 237  | 11118 | 68    |
| H(13A) | 2658  | 2591 | 3183  | 144   |
| H(13B) | 3411  | 3416 | 3854  | 144   |
| H(14A) | 5501  | 1729 | 4376  | 285   |
| H(14B) | 5238  | 1576 | 3280  | 285   |
| H(14C) | 4538  | 565  | 4209  | 285   |
